# Supplementary material for: Inflammatory and coagulatory parameters linked to survival in critically ill children with sepsis
Source: PubMed Central journal article supplement (PMC6240023; doi:10.1186/s13613-018-0457-8), 2018-11-16

**A**

Survival predicted by fibrinogen

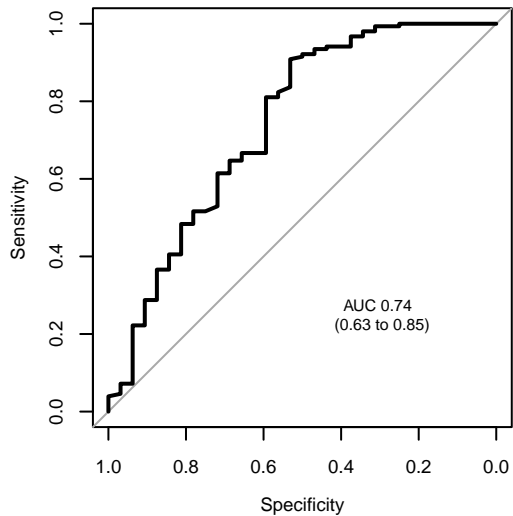**B**

Survival predicted by platelets

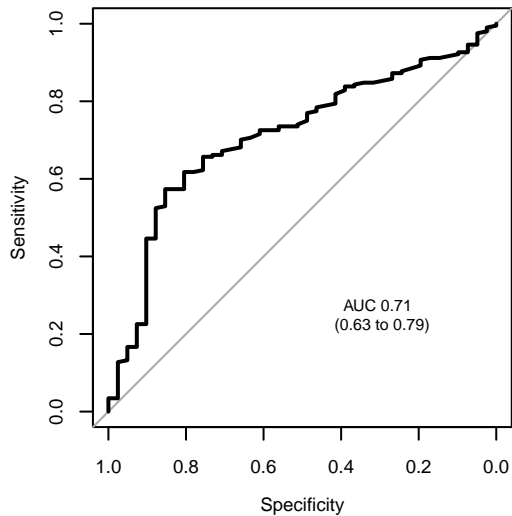**C**

Survival predicted by aPTT

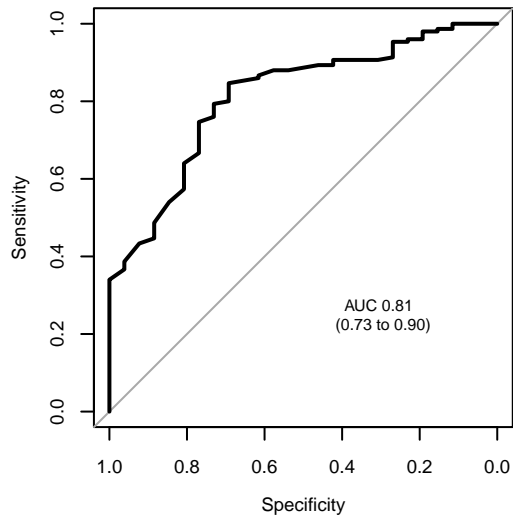

Supplement: 13613_2018_457_MOESM1_ESM.pdf [file 13613_2018_457_MOESM1_ESM.pdf]
